# Supplementary material
Source: Springer Nature journal article supplement (https://www.springermedizin.de/resource/supplementary/13099_2013_165_MOESM2_ESM.pdf/9665666)
Supplement: MOESM2 [file 9665666]

### Subsystem Coverage

### Subsystem Category Distribution

### Subsystem Feature Counts

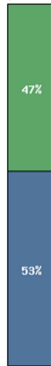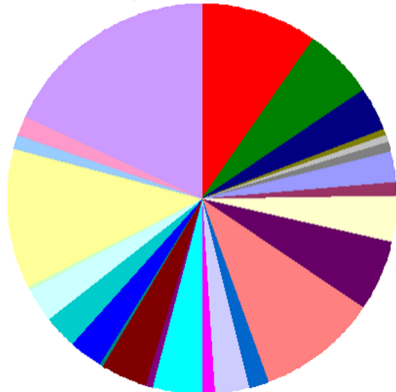

- ⊕ Cofactors, Vitamins, Prosthetic Groups, Pigments (247)
- ⊕ Cell Wall and Capsule (148)
- ⊕ Virulence, Disease and Defense (91)
- ⊕ Potassium metabolism (12)
- ⊕ Photosynthesis (0)
- ⊕ Miscellaneous (11)
- ⊕ Phages, Prophages, Transposable elements, Plasmids (27)
- ⊕ Membrane Transport (60)
- ⊕ Iron acquisition and metabolism (29)
- ⊕ RNA Metabolism (99)
- ⊕ Nucleosides and Nucleotides (144)
- ⊕ Protein Metabolism (250)
- ⊕ Cell Division and Cell Cycle (42)
- ⊕ Motility and Chemotaxis (68)
- ⊕ Regulation and Cell signaling (28)
- ⊕ Secondary Metabolism (0)
- ⊕ DNA Metabolism (108)
- ⊕ Regulons (9)
- ⊕ Fatty Acids, Lipids, and Isoprenoids (98)
- ⊕ Nitrogen Metabolism (9)
- ⊕ Dormancy and Sporulation (68)
- ⊕ Respiration (73)
- ⊕ Stress Response (67)
- ⊕ Metabolism of Aromatic Compounds (11)
- ⊕ Amino Acids and Derivatives (293)
- ⊕ Sulfur Metabolism (24)
- ⊕ Phosphorus Metabolism (43)
- ⊕ Carbohydrates (450)
